# Supplementary material for: Molecular Basis for Evolving Modularity in the Yeast Protein Interaction Network
Source: PLOS journal article supplement (doi:10.1371/journal.pcbi.0030226), 2007-11-07
Supplement: S1 (10.1371/journal.pcbi.0030226.s001) [file journal.pcbi.0030226.sd001.pdf › journal.pcbi.0030226.sd001.pdf]

**Protocol S1  
Supporting Data**

**Molecular basis for evolving modularity in the  
yeast protein interaction network**

Ariel Fernández

Department of Bioengineering, Rice University,  
Houston, TX 77005

Department of Computer Science, The University of Chicago,  
Chicago, IL 60637

Phone: 713 348 3681; Fax: 713 348 3699; E-mail: arifer@rice.edu

**I. PDB-reported intra-modular hubs in yeast class \((11111) \***

**(\*) The class \((11111) is the complement of the ancestral class (11111) of proteins with orthologs in all life domains considered, and thus contains all the nodes incorporated to the ancestral network up to the present day.**

| SWISSPROT |         |             |       |      | PDB    |                 |
|-----------|---------|-------------|-------|------|--------|-----------------|
| ID        | ORF     | Gene name   | conn. | Code | Method | Chain           |
| P02309    | YNL030W | H4_YEAST    | 38    | 2FSB | Model  | B/F=1-103       |
| P02309    | YNL030W | H4_YEAST    | 38    | 1ID3 | X-ray  | B/F=1-103       |
| Q02821    | YNL189W | IMA1_YEAST  | 30    | 2C1T | X-ray  | A/B=88-541      |
| Q02821    | YNL189W | IMA1_YEAST  | 30    | 1WA5 | X-ray  | B=1-530         |
| Q02821    | YNL189W | IMA1_YEAST  | 30    | 1UN0 | X-ray  | A/B=88-530      |
| Q02821    | YNL189W | IMA1_YEAST  | 30    | 1EE5 | X-ray  | A=87-510        |
| Q02821    | YNL189W | IMA1_YEAST  | 30    | 1EE4 | X-ray  | A/B=87-509      |
| Q02821    | YNL189W | IMA1_YEAST  | 30    | 1BK6 | X-ray  | A/B=89-510      |
| Q02821    | YNL189W | IMA1_YEAST  | 30    | 1BK5 | X-ray  | A/B=89-510      |
| P02829    | YPL240C | HSP82_YEAST | 30    | 2CGE | X-ray  | A/B/D           |
| P02829    | YPL240C | HSP82_YEAST | 30    | 2CG9 | X-ray  | A/B             |
| P02829    | YPL240C | HSP82_YEAST | 30    | 2BRE | X-ray  | A/B=1-219       |
| P02829    | YPL240C | HSP82_YEAST | 30    | 2BRC | X-ray  | A=1-214         |
| P02829    | YPL240C | HSP82_YEAST | 30    | 2AKP | X-ray  | A/B=25-210      |
| P02829    | YPL240C | HSP82_YEAST | 30    | 1ZWH | X-ray  | A=1-220         |
| P02829    | YPL240C | HSP82_YEAST | 30    | 1USV | X-ray  | A/C/E/G=272-530 |
| P02829    | YPL240C | HSP82_YEAST | 30    | 1USU | X-ray  | A=273-530       |
| P02829    | YPL240C | HSP82_YEAST | 30    | 1US7 | X-ray  | A=1-214         |
| P02829    | YPL240C | HSP82_YEAST | 30    | 1HK7 | X-ray  | A/B=273-560     |

|        |         |             |    |      |       |                |
|--------|---------|-------------|----|------|-------|----------------|
| P02829 | YPL240C | HSP82_YEAST | 30 | 1BGQ | X-ray | A              |
| P02829 | YPL240C | HSP82_YEAST | 30 | 1AMW | X-ray | A=1-214        |
| P02829 | YPL240C | HSP82_YEAST | 30 | 1AM1 | X-ray | 2-214          |
| P02829 | YPL240C | HSP82_YEAST | 30 | 1AH8 | X-ray | A/B=1-220      |
| P02829 | YPL240C | HSP82_YEAST | 30 | 1AH6 | X-ray | 1-220          |
| P02829 | YPL240C | HSP82_YEAST | 30 | 1A4H | X-ray | 1-220          |
| P13393 | YER148W | TBP_YEAST   | 26 | 1YTF | X-ray | A=61-240       |
| P13393 | YER148W | TBP_YEAST   | 26 | 1YTB | X-ray | A/B=61-240     |
| P13393 | YER148W | TBP_YEAST   | 26 | 1TBP | X-ray | A/B=62-240     |
| P13393 | YER148W | TBP_YEAST   | 26 | 1TBA | NMR   | B=61-240       |
| P13393 | YER148W | TBP_YEAST   | 26 | 1RM1 | X-ray | A=1-240        |
| P13393 | YER148W | TBP_YEAST   | 26 | 1NH2 | X-ray | A=61-240       |
| P13393 | YER148W | TBP_YEAST   | 26 | 1NGM | X-ray | A/E/I/M=61-240 |
| Q06142 | YLR347C | IMB1_YEAST  | 22 | 2BPT | X-ray | A=1-861        |
| Q06142 | YLR347C | IMB1_YEAST  | 22 | 2BKU | X-ray | B/D=1-861      |
| P52286 | YDR328C | SKP1_YEAST  | 22 | 1NEX | X-ray | A/C=1-194      |
| P04050 | YDL140C | RPB1_YEAST  | 21 | 2B8K | X-ray | A=1-1733       |
| P04050 | YDL140C | RPB1_YEAST  | 21 | 2B63 | X-ray | A=1-1733       |
| P04050 | YDL140C | RPB1_YEAST  | 21 | 1Y77 | X-ray | A=1-1733       |
| P04050 | YDL140C | RPB1_YEAST  | 21 | 1Y1Y | X-ray | A              |
| P04050 | YDL140C | RPB1_YEAST  | 21 | 1Y1W | X-ray | A=1-1733       |
| P04050 | YDL140C | RPB1_YEAST  | 21 | 1Y1V | X-ray | A=1-1733       |
| P04050 | YDL140C | RPB1_YEAST  | 21 | 1WCM | X-ray | A=1-1733       |
| P04050 | YDL140C | RPB1_YEAST  | 21 | 1TWH | X-ray | A=1-1733       |
| P04050 | YDL140C | RPB1_YEAST  | 21 | 1TWG | X-ray | A=1-1733       |
| P04050 | YDL140C | RPB1_YEAST  | 21 | 1TWF | X-ray | A=1-1733       |
| P04050 | YDL140C | RPB1_YEAST  | 21 | 1TWC | X-ray | A=1-1733       |
| P04050 | YDL140C | RPB1_YEAST  | 21 | 1TWA | X-ray | A=1-1733       |
| P04050 | YDL140C | RPB1_YEAST  | 21 | 1SFO | X-ray | A=1-1733       |
| P04050 | YDL140C | RPB1_YEAST  | 21 | 1R9T | X-ray | A=1-1733       |
| P04050 | YDL140C | RPB1_YEAST  | 21 | 1R9S | X-ray | A=1-1733       |
| P04050 | YDL140C | RPB1_YEAST  | 21 | 1R5U | X-ray | A=1-1733       |
| P04050 | YDL140C | RPB1_YEAST  | 21 | 1PQV | X-ray | A=1-1733       |
| P04050 | YDL140C | RPB1_YEAST  | 21 | 1NT9 | X-ray | A=1-1733       |
| P04050 | YDL140C | RPB1_YEAST  | 21 | 1NIK | X-ray | A=1-1733       |
| P04050 | YDL140C | RPB1_YEAST  | 21 | 1K83 | X-ray | A=1-1733       |
| P04050 | YDL140C | RPB1_YEAST  | 21 | 1I6H | X-ray | A=1-1733       |
| P04050 | YDL140C | RPB1_YEAST  | 21 | 1I50 | X-ray | A=1-1733       |
| P04050 | YDL140C | RPB1_YEAST  | 21 | 1I3Q | X-ray | A=1-1733       |
| P06787 | YBR109C | CALM_YEAST  | 16 | 1LKJ | NMR   | A=2-147        |
| P06787 | YBR109C | CALM_YEAST  | 16 | 1F55 | NMR   | A=2-78         |
| P06787 | YBR109C | CALM_YEAST  | 16 | 1F54 | NMR   | A=2-78         |
| P39517 | YDL160C | DHH1_YEAST  | 15 | 1S2M | X-ray | A=31-425       |
| P29468 | YKR002W | PAP_YEAST   | 15 | 1FA0 | X-ray | A/B=1-537      |
| P39081 | YDR228C | PCF11_YEAST | 14 | 2BF0 | X-ray | X=1-138        |
| P39081 | YDR228C | PCF11_YEAST | 14 | 1SZA | X-ray | A/B/C=1-140    |
| P39081 | YDR228C | PCF11_YEAST | 14 | 1SZ9 | X-ray | A/B/C=1-140    |
| P32628 | YEL037C | RAD23_YEAST | 14 | 1X3Z | X-ray | B=238-309      |
| P32628 | YEL037C | RAD23_YEAST | 14 | 1X3W | X-ray | B=238-309      |
| P25293 | YKR048C | NAP1_YEAST  | 14 | 2AYU | X-ray | A=1-417        |

|        |         |             |    |      |       |                             |
|--------|---------|-------------|----|------|-------|-----------------------------|
| P17255 | YDL185W | VATA_YEAST  | 14 | 1VDE | X-ray | A/B=284-737                 |
| P17255 | YDL185W | VATA_YEAST  | 14 | 1UM2 | X-ray | A/B=285-737,<br>C/D=274-288 |
| P17255 | YDL185W | VATA_YEAST  | 14 | 1LWT | X-ray | A=284-737                   |
| P17255 | YDL185W | VATA_YEAST  | 14 | 1LWS | X-ray | A=284-737                   |
| P17255 | YDL185W | VATA_YEAST  | 14 | 1JVA | X-ray | A/B=274-747                 |
| P17255 | YDL185W | VATA_YEAST  | 14 | 1GPP | X-ray | A=284-483                   |
| P17255 | YDL185W | VATA_YEAST  | 14 | 1EF0 | X-ray | A/B                         |
| P17255 | YDL185W | VATA_YEAST  | 14 | 1DFA | X-ray | A=284-737                   |
| P06169 | YLR044C | PDC1_YEAST  | 13 | 1QPB | X-ray | A/B=1-563                   |
| P06169 | YLR044C | PDC1_YEAST  | 13 | 1PYD | X-ray | A/B=1-556                   |
| P06169 | YLR044C | PDC1_YEAST  | 13 | 1PVD | X-ray | A/B=1-556                   |
| Q03330 | YGR252W | GCN5_YEAST  | 12 | 1YGH | X-ray | A/B=99-262                  |
| Q03330 | YGR252W | GCN5_YEAST  | 12 | 1E6I | X-ray | A=324-439                   |
| P41832 | YNL271C | BNI1_YEAST  | 12 | 1Y64 | X-ray | B=1327-1769                 |
| P41832 | YNL271C | BNI1_YEAST  | 12 | 1UX5 | X-ray | A=1350-1760                 |
| P41832 | YNL271C | BNI1_YEAST  | 12 | 1UX4 | X-ray | A/B=1352-1765               |
| P38262 | YBR103W | SIF2_YEAST  | 12 | 1R5M | X-ray | A=113-535                   |
| P22336 | YAR007C | RFA1_YEAST  | 12 | 1YNX | NMR   | A=181-294                   |
| P14907 | YJL041W | NSP1_YEAST  | 12 | 1O6O | X-ray | D/E/F=497-608               |
| P11433 | YAL041W | CDC24_YEAST | 12 | 1Q1O | NMR   | A=761-854                   |
| P11433 | YAL041W | CDC24_YEAST | 12 | 1PQS | NMR   | A=778-854                   |
| P06782 | YDR477W | SNF1_YEAST  | 12 | 2FH9 | X-ray | A=46-319                    |
| P06782 | YDR477W | SNF1_YEAST  | 12 | 2EUE | X-ray | A/B=41-315                  |
| P04147 | YER165W | PABP_YEAST  | 12 | 1IFW | NMR   | A=489-577                   |
| P29366 | YBR200W | BEM1_YEAST  | 11 | 1IPG | NMR   | A=472-551                   |
| P29366 | YBR200W | BEM1_YEAST  | 11 | 1IP9 | NMR   | A=472-551                   |
| P10081 | YJL138C | IF4A_YEAST  | 11 | 1QVA | X-ray | A=1-224                     |
| P10081 | YJL138C | IF4A_YEAST  | 11 | 1QDE | X-ray | A=9-232                     |
| P10081 | YJL138C | IF4A_YEAST  | 11 | 1FUU | X-ray | A/B=1-395                   |
| P10081 | YJL138C | IF4A_YEAST  | 11 | 1FUK | X-ray | A=231-395                   |
| P34162 | YHR041C | MED20_YEAST | 10 | 2HZS | X-ray | A/C/E/G=2-210               |
| P34162 | YHR041C | MED20_YEAST | 10 | 2HZM | X-ray | A/C/E/G=1-210               |
| P16892 | YBL016W | FUS3_YEAST  | 10 | 2FA2 | X-ray | A/B=1-353                   |
| P16892 | YBL016W | FUS3_YEAST  | 10 | 2F9G | X-ray | A=1-353                     |
| P16892 | YBL016W | FUS3_YEAST  | 10 | 2F49 | X-ray | A=1-353                     |
| P16892 | YBL016W | FUS3_YEAST  | 10 | 2B9J | X-ray | A=1-353                     |
| P16892 | YBL016W | FUS3_YEAST  | 10 | 2B9I | X-ray | A=1-353                     |
| P16892 | YBL016W | FUS3_YEAST  | 10 | 2B9H | X-ray | A=1-353                     |
| P16892 | YBL016W | FUS3_YEAST  | 10 | 2B9F | X-ray | A=1-353                     |
| P54784 | YML065W | ORC1_YEAST  | 9  | 1ZHI | X-ray | A=1-219                     |
| P54784 | YML065W | ORC1_YEAST  | 9  | 1ZBX | X-ray | A=1-219                     |
| P54784 | YML065W | ORC1_YEAST  | 9  | 1M4Z | X-ray | A/B=1-235                   |
| P22216 | YPL153C | RAD53_YEAST | 9  | 2A0T | NMR   | A=14-164                    |
| P22216 | YPL153C | RAD53_YEAST | 9  | 1QU5 | NMR   | A=549-730                   |
| P22216 | YPL153C | RAD53_YEAST | 9  | 1K3Q | NMR   | A=14-164                    |
| P22216 | YPL153C | RAD53_YEAST | 9  | 1K3N | NMR   | A=14-164                    |
| P22216 | YPL153C | RAD53_YEAST | 9  | 1K3J | NMR   | A=14-164                    |
| P22216 | YPL153C | RAD53_YEAST | 9  | 1K2N | NMR   | A=573-730                   |
| P22216 | YPL153C | RAD53_YEAST | 9  | 1K2M | NMR   | A=573-730                   |

|        |         |             |   |      |       |                    |
|--------|---------|-------------|---|------|-------|--------------------|
| P22216 | YPL153C | RAD53_YEAST | 9 | 1J4Q | NMR   | A=14-164           |
| P22216 | YPL153C | RAD53_YEAST | 9 | 1J4P | NMR   | A=14-164           |
| P22216 | YPL153C | RAD53_YEAST | 9 | 1J4O | NMR   | A=14-164           |
| P22216 | YPL153C | RAD53_YEAST | 9 | 1J4L | NMR   | A=573-730          |
| P22216 | YPL153C | RAD53_YEAST | 9 | 1J4K | NMR   | A=573-730          |
| P22216 | YPL153C | RAD53_YEAST | 9 | 1G6G | X-ray | A/B=29-155         |
| P22216 | YPL153C | RAD53_YEAST | 9 | 1G3G | NMR   | A=2-164            |
| P22216 | YPL153C | RAD53_YEAST | 9 | 1FHR | NMR   | A=573-730          |
| P22216 | YPL153C | RAD53_YEAST | 9 | 1FHQ | NMR   | A=573-730          |
| P22216 | YPL153C | RAD53_YEAST | 9 | 1DMZ | NMR   | A=573-730          |
| P17555 | YNL138W | CAP_YEAST   | 9 | 1KQ5 | X-ray | A/B=369-526        |
| P17555 | YNL138W | CAP_YEAST   | 9 | 1K4Z | X-ray | A/B=369-526        |
| Q08649 | YOR244W | ESA1_YEAST  | 8 | 1MJB | X-ray | A=160-435          |
| Q08649 | YOR244W | ESA1_YEAST  | 8 | 1MJA | X-ray | A=160-435          |
| Q08649 | YOR244W | ESA1_YEAST  | 8 | 1MJ9 | X-ray | A=160-435          |
| Q08649 | YOR244W | ESA1_YEAST  | 8 | 1FY7 | X-ray | A=160-435          |
| Q08278 | YOL135C | MED7_YEAST  | 8 | 1YKH | X-ray | A=102-205          |
| Q08278 | YOL135C | MED7_YEAST  | 8 | 1YKE | X-ray | A/C=102-205        |
| P38304 | YBR193C | MED8_YEAST  | 8 | 2HZS | X-ray | I/J/K/L=190-216    |
| P34087 | YDR404C | RPB7_YEAST  | 8 | 2B8K | X-ray | G=1-171            |
| P34087 | YDR404C | RPB7_YEAST  | 8 | 2B63 | X-ray | G=1-171            |
| P34087 | YDR404C | RPB7_YEAST  | 8 | 1Y77 | X-ray | G=1-171            |
| P34087 | YDR404C | RPB7_YEAST  | 8 | 1Y1Y | X-ray | G                  |
| P34087 | YDR404C | RPB7_YEAST  | 8 | 1Y1W | X-ray | G=1-171            |
| P34087 | YDR404C | RPB7_YEAST  | 8 | 1Y1V | X-ray | G=1-171            |
| P34087 | YDR404C | RPB7_YEAST  | 8 | 1Y14 | X-ray | B/D=1-171          |
| P34087 | YDR404C | RPB7_YEAST  | 8 | 1WCM | X-ray | G=1-171            |
| P34087 | YDR404C | RPB7_YEAST  | 8 | 1PQV | X-ray | G=1-171            |
| P34087 | YDR404C | RPB7_YEAST  | 8 | 1NT9 | X-ray | G=1-171            |
| P32776 | YDR311W | TFB1_YEAST  | 8 | 2GS0 | NMR   | A=1-115            |
| P32776 | YDR311W | TFB1_YEAST  | 8 | 1Y50 | NMR   | A=2-115            |
| P25454 | YER095W | RAD51_YEAST | 8 | 1SZP | X-ray | A/B/C/D/E/F=81-400 |
| P23561 | YLR362W | STE11_YEAST | 8 | 1X9X | NMR   | A/B=37-104         |
| P23561 | YLR362W | STE11_YEAST | 8 | 1OW5 | NMR   | A=36-113           |
| P18851 | YOR212W | GBB_YEAST   | 8 | 1SCG | Model | B=1-423            |
| P16649 | YCR084C | TUP1_YEAST  | 8 | 1ERJ | X-ray | A/B/C=282-713      |

## II. Variation in functional composition with network evolution

To fully characterize the evolutionary trend towards increasing modularity, the functional composition of the ancient network is contrasted against the present-day network, using the genetic ontology (GO) Slim classification of open reading frames [1]. The functional distribution differences associated with evolutionary change are shown in Fig. S1. We find that the relative representation of certain functional categories persists throughout evolutionary change, in spite of the drastic reduction in number of proteins. Furthermore, dominant

functionalities that become significant in the ancient network may be identified by a representativity larger than twice the basal value 3.5% of the corresponding representativity of the functional class in the present-day proteome. The basal value corresponds to the fact that the ancient proteome contains 3.5% of present-day proteins. Thus, dominant functional classes in the ancient network are: ribosome, RNA metabolism, transcription, nuclear organization, signal transduction and stress response.

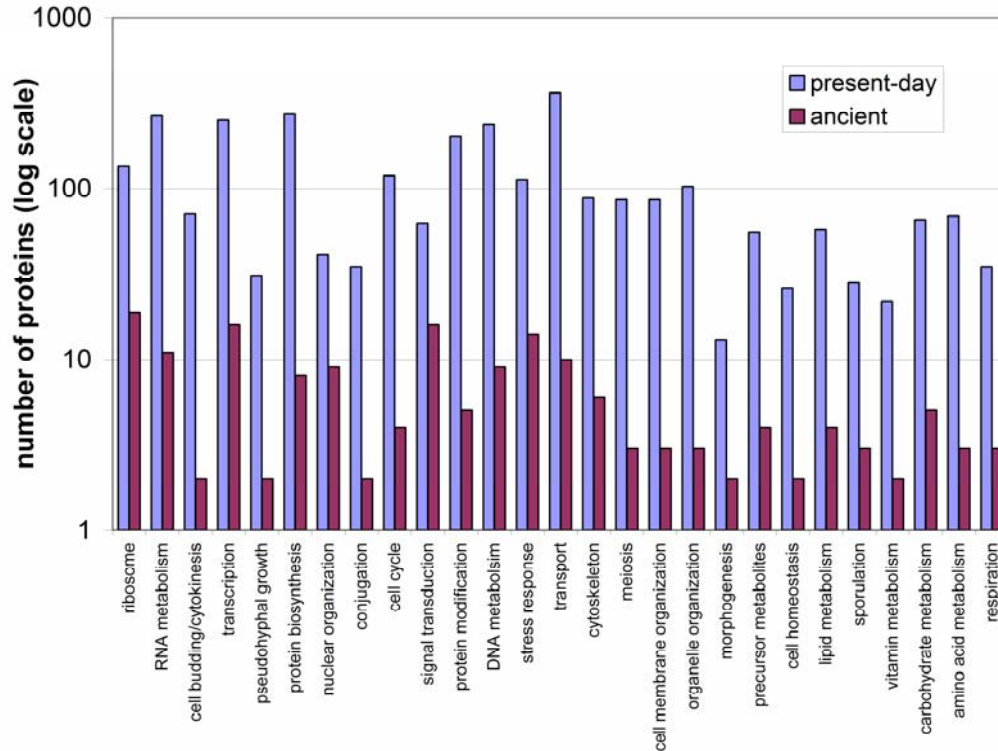

**Figure S1.** Functional composition of present-day and ancient proteome. The classification used the slim gene ontology (GO).

### III. Supplementary results on the ortholog-based trimming procedure

Our analysis of the topological evolution of modularity hinges on the validity of a trimming procedure based on the retention of nodes according to their extent of orthologous representation. This procedure is supported by recent analysis [2], yet it is somewhat at odds with the estimation by Wagner [3] that interactions in yeast are lost at a rate of  $2.2 \times 10^{-3}$ /million year. This assessment uses the extent of synonymous substitution as surrogate for evolutionary time and adopts high-throughput two-hybrid experiments to map protein interactions. The latter data is known to be unreliable and plagued by false positives [4] and would require a careful curation which was not performed at the time of the analysis. Furthermore, to assess the

loss of interactions, one would need to perform a structural analysis to verify whether indeed the protein interfaces have been modified or have coevolved through evolutionary change, which is not likely to be uniform across the protein chain. This analysis was not carried out in [3]. Most importantly, the assertion on the loss of interactions is at odds with the established high level of conservation of functionally competent protein interfaces [5, 6].

1. Prachumwat A, Li W-H (2006) Protein function, connectivity and duplicability in yeast. *Mol Biol Evol* 23: 30-39
2. Qin H, Lu H S, Wu W B, Li W-H (2003) Evolution of the yeast protein interaction network. *Proc Natl Acad Sci USA* 100: 12820-12824
3. Wagner A (2001) The yeast protein interaction network evolves rapidly and contains few redundant duplicate genes. *Mol Biol Evol* 18: 1283-1292
4. Krogan D, Cagney G, Yu H, Zhong G, Guo X, *et al.* (2006) Global landscape of protein complexes in the yeast *Saccharomyces cerevisiae*. *Nature* 440: 637-643
5. Fernández A, Berry R S (2004) Molecular dimension explored in evolution to promote proteomic complexity. *Proc Natl Acad Sci USA* 101: 13460-13465
6. Kim P M, Lu L J, Xia Y, Guerstein M B (2006) Relating three-dimensional structures to protein networks provides evolutionary insights. *Science* 314: 1938-1941
